# Supplementary material
Source: MDPI journal article supplement (https://www.mdpi.com/2073-4395/12/1/224)
Supplement: s1 [file s1]

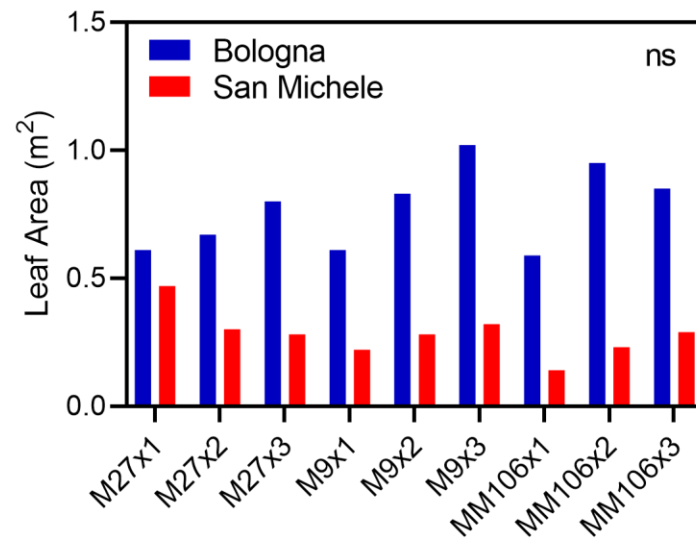

Figure S1. Effect of the interaction 'rootstock x axis number' on total leaf area (m<sup>2</sup>) per tree at two different sites of cultivation: University of Bologna (Bologna, BO) and Istituto Agrario di San Michele all'Adige (San Michele, SM) in Italy. Significance: ns =non-significant at  $P < 0.05$ .

Table S1. Fertilization plan in Bologna and San Michele, Italy, and Hawke's Bay, New Zealand.

| <b>Bologna (BO)</b> |                            | <b>San Michele (SM)</b> |               | <b>Hawke's Bay (HB)</b> |                            |
|---------------------|----------------------------|-------------------------|---------------|-------------------------|----------------------------|
| Date of Application | N <sup>a</sup><br>(g/tree) | Date of Application     | N<br>(g/tree) | Date of Application     | N <sup>b</sup><br>(g/tree) |
| May 7               | 1.56                       | July 2                  | 3.5           | 2nd week of Nov         | 1.51                       |
| May 17              | 1.56                       | July 7                  | 3.5           | 3rd week of Dec         | 1.51                       |
| May 27              | 1.56                       | July 14                 | 3.5           | 3rd week of Jan         | 1.51                       |
| June 5              | 1.56                       | July 23                 | 3.5           | 1st week of March       | 1.51                       |
| June 13             | 1.56                       | July 29                 | 3.5           |                         |                            |
| June 23             | 1.56                       | August 3                | 3.5           |                         |                            |
| July 3              | 1.56                       | August 7                | 3.5           |                         |                            |
| July 13             | 1.56                       | August 11               | 3.5           |                         |                            |
|                     |                            | August 19               | 3.5           |                         |                            |
|                     |                            | September 4             | 3.5           |                         |                            |
|                     |                            | September 20            | 3.5           |                         |                            |

<sup>a</sup>At the BO and SM sites, a complex mineral fertilizer (21-7-14) and a calcium nitrate (15.5% N) were distributed over the season; <sup>b</sup>At the HB site, calcium ammonium nitrate (CAN, 27% N) was applied to the soil at a rate of 14g CAN/m<sup>2</sup> at regular intervals
